# Supplementary figures and images for: Anti-Dengue Activity of Lipophilic Fraction of Ocimum basilicum L. Stem
Source: MDPI journal article supplement (doi:10.3390/molecules28031446), 2023-02-02

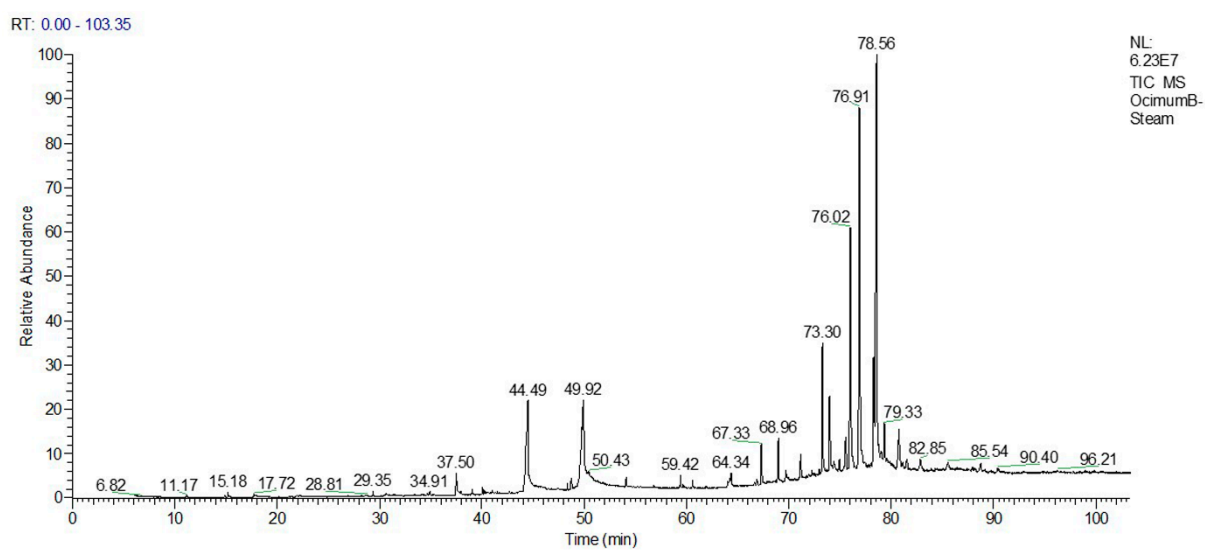

**Figure S1.** GC-TIC chromatogram of lipophilic fraction of *O. basilicum* stem.

Supplement: s1 [file s1]
